# Supplementary material for: Precise and accurate boron and lithium isotopic determinations for small sample-size geological materials by MC-ICP-MS
Source: Royal Society of Chemistry journal article supplement (doi:10.1039/c7ja00400a), 2018-01-01
Supplement: c7ja00400a1.pdf [file c7ja00400a1.pdf]

Supplementary Materials

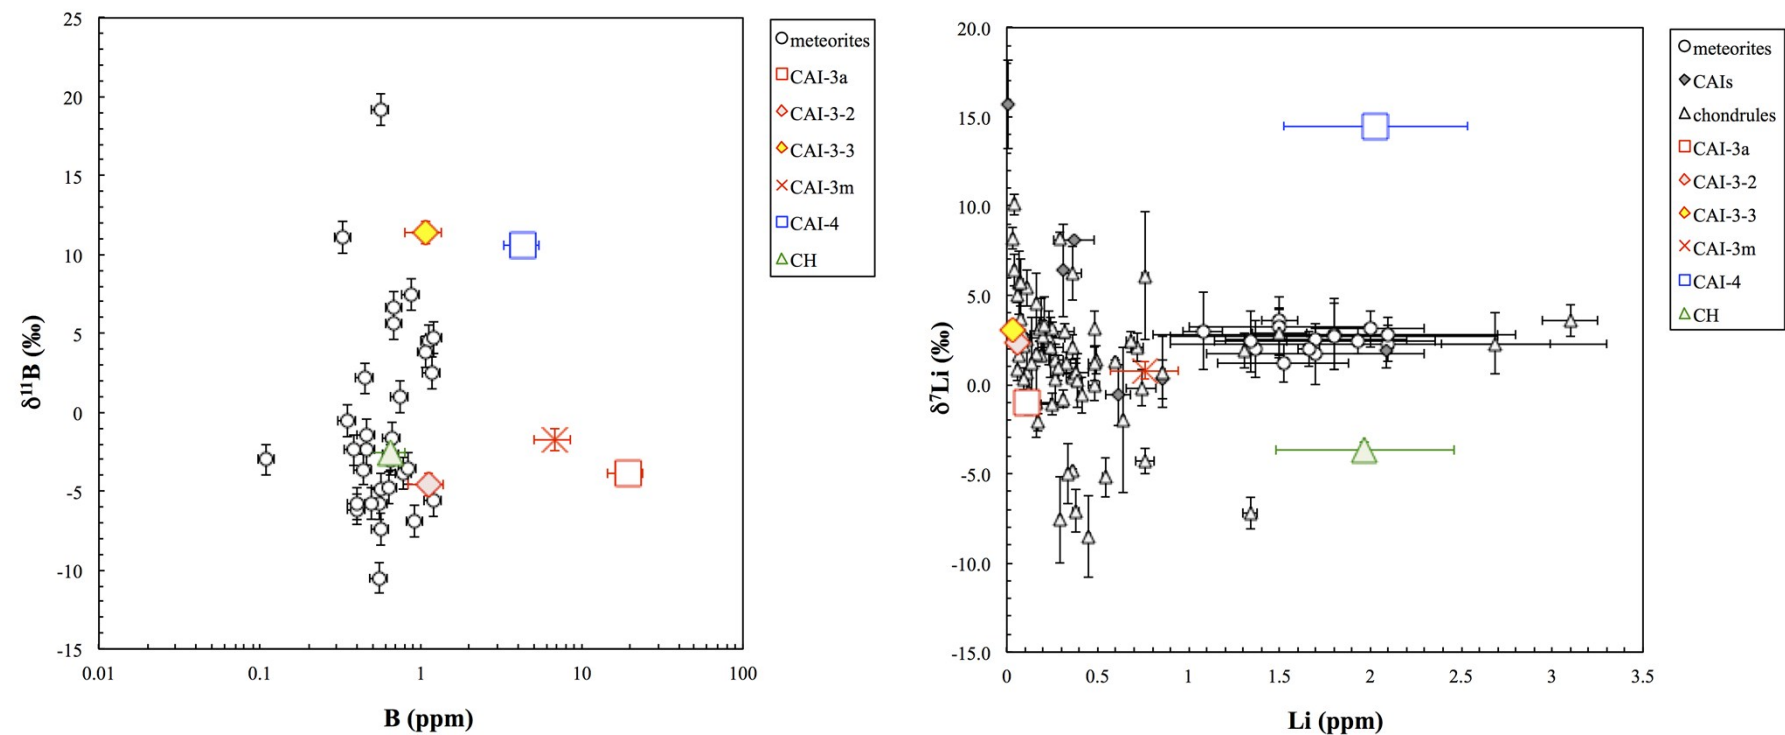

Fig. S1. (a)  $\delta^{11}\text{B}$  values vs. B concentrations and (b)  $\delta^7\text{Li}$  values vs. Li concentrations in bulk CAIs, chondrule (CH), CAI separated phases, and chondrite matrix from the Allende CV3 meteorites. The published B and Li isotopic compositions of bulk CAIs, chondrules, and meteorites are also plotted for comparison.<sup>9,10,11</sup> The analytical errors for the measured  $\delta^{11}\text{B}$  and  $\delta^7\text{Li}$  in this study are smaller than the symbols

## Supplementary Materials

Table S1. Elemental and isotopic data for bulk CAIs, chondrule, CAI separated phases, and chondrite matrix from the Allende CV3 meteorites

| Sample ID      | Description      | Be (ppm) | RSD (%) | Li (ppm) | RSD (%) | B (ppm) | RSD (%) | $\delta^7\text{Li}$ (‰) | 2SE (‰) | $\delta^{11}\text{B}$ (‰) | 2SE (‰) |
|----------------|------------------|----------|---------|----------|---------|---------|---------|-------------------------|---------|---------------------------|---------|
| <b>CAI-3a</b>  | transparent CAI  | 0.19     | 1.8     | 0.11     | 2.4     | 19.2    | 0.5     | -1.0                    | 0.6     | -3.9                      | 0.2     |
| <b>CAI-3-2</b> | bulk CAI         | 0.28     | 3.0     | 0.06     | 0.3     | 1.11    | 0.7     | +2.3                    | 0.3     | -4.6                      | 0.2     |
| <b>CAI-3-3</b> | bulk CAI         | 0.18     | 5.3     | 0.04     | 5.4     | 1.07    | 5.5     | +3.0                    | 0.3     | +11.4                     | 0.3     |
| <b>CAI-3m</b>  | chondrite matrix | 0.03     | 1.2     | 0.76     | 1.1     | 6.78    | 0.3     | +0.8                    | 0.1     | -1.7                      | 0.2     |
| <b>CAI-4</b>   | transparent CAI  | 0.03     | 2.9     | 2.03     | 2.9     | 4.35    | 1.4     | +14.5                   | 0.2     | +10.6                     | 0.3     |
| <b>CH</b>      | chondrule        | 0.03     | 1.2     | 1.97     | 2.5     | 0.64    | 1.0     | -3.7                    | 0.2     | -2.5                      | 0.3     |
